# Supplementary material
Source: Research Square preprint supplement (doi:10.21203/rs.3.rs-9286413/v1)
Supplement: Supplementary file 1 [file d1cbfd3c9706ddbf04ad71ed.pdf]

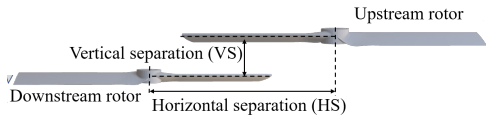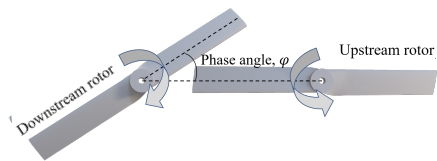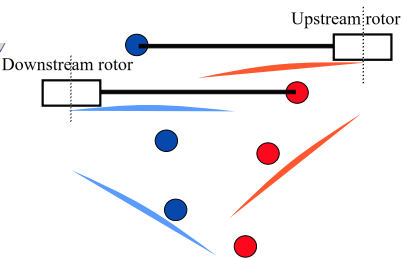

**Lowest thrust:**  
Wake structures convect downstream without interaction.

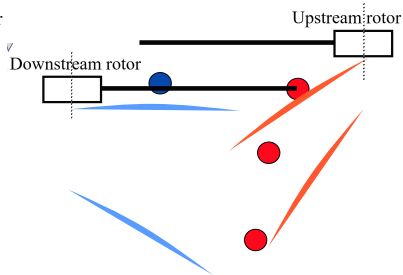

**Intermediate thrust:**  
Upstream tip vortex impinges and dissipates on the downstream blade.

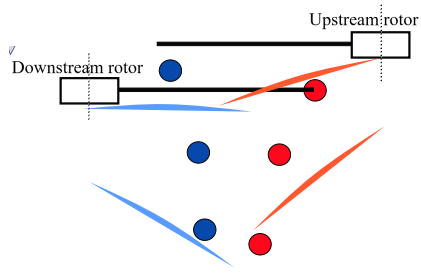

**Highest thrust:**  
Upstream tip vortex aligns near the downstream blade.
